# Supplementary material for: Blue absorption and red emission of Bi2+ in solids: strongly spin–orbit coupled 6p levels in low symmetry fields
Source: Royal Society of Chemistry journal article supplement (doi:10.1039/c4cp01873g), 2014-01-01
Supplement: c4cp01873g1.pdf [file c4cp01873g1.pdf]

## V SUPPLEMENTARY MATERIAL

## Figure captions

FIG. 11: Energies of the spin-orbit coupling states under cubic, tetragonal, and orthorombic fields. The energy of the cube with  $d(\text{Bi-O})=2.55 \text{ \AA}$  is taken as reference. The insets zoom the region of small  $S_2(e_g \theta)$  and  $S_3(e_g \epsilon)$  distortions between  $-0.072$  and  $+0.072 \text{ \AA}$  and between  $19710$  and  $19930 \text{ cm}^{-1}$  to reveal the almost perfect mexican hat of the  $G_u \otimes e_g$  Jahn-Teller coupling, which is isomorphous to the standard  $E \otimes e$  Jahn-Teller coupling [Reference 38].

FIG. 12: Energies of the spin-orbit coupling states in  $D_4$ ,  $D_{2d}$  and  $D_2$  fields. The energy of the cube with  $d(\text{Bi-O})=2.55 \text{ \AA}$  is taken as reference.

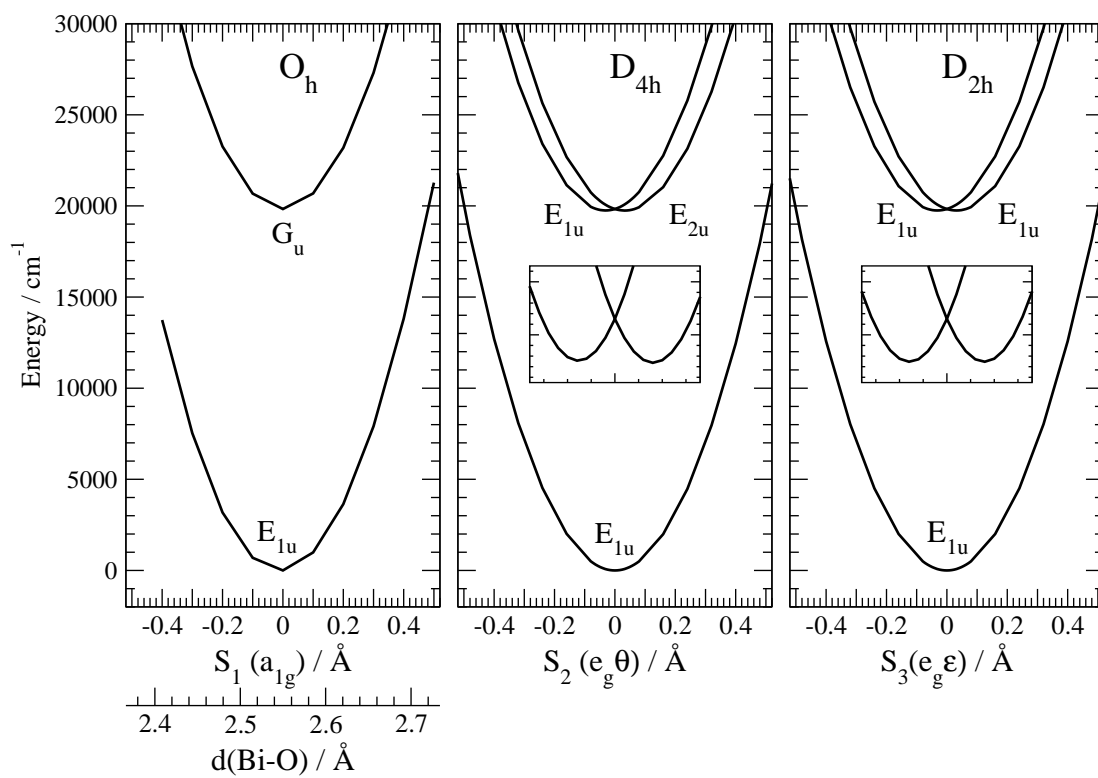

Figure 11. Seijo and Barandiarán

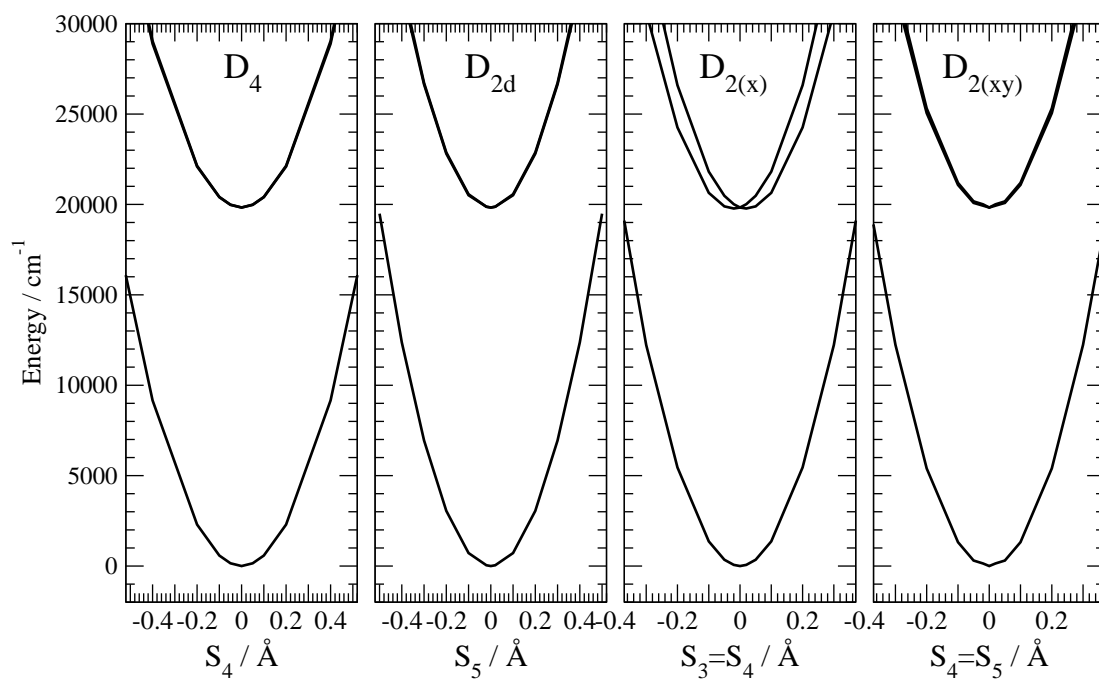

Figure 12. Seijo and Barandiarán
